# Supplementary material for: PALB2 chromatin recruitment restores homologous recombination in BRCA1-deficient cells depleted of 53BP1
Source: PubMed Central journal article supplement (PMC7010753; doi:10.1038/s41467-020-14563-y), 2020-02-10
Supplement: 41467_2020_14563_MOESM7_ESM.pdf [file 41467_2020_14563_MOESM7_ESM.pdf]

## Reporting Summary

Nature Research wishes to improve the reproducibility of the work that we publish. This form provides structure for consistency and transparency in reporting. For further information on Nature Research policies, see [Authors & Referees](#) and the [Editorial Policy Checklist](#).

### Statistics

For all statistical analyses, confirm that the following items are present in the figure legend, table legend, main text, or Methods section.

n/a Confirmed

- |                                     |                                     |                                                                                                                                                                                                                                                            |
|-------------------------------------|-------------------------------------|------------------------------------------------------------------------------------------------------------------------------------------------------------------------------------------------------------------------------------------------------------|
| <input type="checkbox"/>            | <input checked="" type="checkbox"/> | The exact sample size ( $n$ ) for each experimental group/condition, given as a discrete number and unit of measurement                                                                                                                                    |
| <input type="checkbox"/>            | <input checked="" type="checkbox"/> | A statement on whether measurements were taken from distinct samples or whether the same sample was measured repeatedly                                                                                                                                    |
| <input type="checkbox"/>            | <input checked="" type="checkbox"/> | The statistical test(s) used AND whether they are one- or two-sided<br><i>Only common tests should be described solely by name; describe more complex techniques in the Methods section.</i>                                                               |
| <input type="checkbox"/>            | <input checked="" type="checkbox"/> | A description of all covariates tested                                                                                                                                                                                                                     |
| <input type="checkbox"/>            | <input checked="" type="checkbox"/> | A description of any assumptions or corrections, such as tests of normality and adjustment for multiple comparisons                                                                                                                                        |
| <input type="checkbox"/>            | <input checked="" type="checkbox"/> | A full description of the statistical parameters including central tendency (e.g. means) or other basic estimates (e.g. regression coefficient) AND variation (e.g. standard deviation) or associated estimates of uncertainty (e.g. confidence intervals) |
| <input type="checkbox"/>            | <input checked="" type="checkbox"/> | For null hypothesis testing, the test statistic (e.g. $F$ , $t$ , $r$ ) with confidence intervals, effect sizes, degrees of freedom and $P$ value noted<br><i>Give <math>P</math> values as exact values whenever suitable.</i>                            |
| <input checked="" type="checkbox"/> | <input type="checkbox"/>            | For Bayesian analysis, information on the choice of priors and Markov chain Monte Carlo settings                                                                                                                                                           |
| <input checked="" type="checkbox"/> | <input type="checkbox"/>            | For hierarchical and complex designs, identification of the appropriate level for tests and full reporting of outcomes                                                                                                                                     |
| <input checked="" type="checkbox"/> | <input type="checkbox"/>            | Estimates of effect sizes (e.g. Cohen's $d$ , Pearson's $r$ ), indicating how they were calculated                                                                                                                                                         |

*Our web collection on [statistics for biologists](#) contains articles on many of the points above.*

### Software and code

Policy information about [availability of computer code](#)

Data collection

High-throughput image data were acquired on Opera Phenix microscope using Harmony High-Content Imaging and Analysis software (Perkin Elmer); super-resolution images were acquired on 3D-SIM OMX microscope (Delta Vision) using SoftWoRx software; laser micro irradiation data were collected on FluoView1000 confocal Olympus microscope and analysed using Fiji software.

Data analysis

For statistical analyses, Microsoft Excel (Microsoft Inc, USA) and GraphPad Prism 8 were used. Graphs were generated using GraphPad Prism 8. Images were processed in Fiji. Figures were prepared using Adobe Photoshop CS5 and Adobe Illustrator CS5 (Adobe Systems Inc, USA).

For manuscripts utilizing custom algorithms or software that are central to the research but not yet described in published literature, software must be made available to editors/reviewers. We strongly encourage code deposition in a community repository (e.g. GitHub). See the Nature Research [guidelines for submitting code & software](#) for further information.

### Data

Policy information about [availability of data](#)

All manuscripts must include a [data availability statement](#). This statement should provide the following information, where applicable:

- Accession codes, unique identifiers, or web links for publicly available datasets
- A list of figures that have associated raw data
- A description of any restrictions on data availability

All relevant data are available from the authors.

## Field-specific reporting

Please select the one below that is the best fit for your research. If you are not sure, read the appropriate sections before making your selection.

Life sciences  Behavioural & social sciences  Ecological, evolutionary & environmental sciences

For a reference copy of the document with all sections, see [nature.com/documents/nr-reporting-summary-flat.pdf](https://www.nature.com/documents/nr-reporting-summary-flat.pdf)

## Life sciences study design

All studies must disclose on these points even when the disclosure is negative.

|                 |                                                                                                                                                                                                                                                                                                         |
|-----------------|---------------------------------------------------------------------------------------------------------------------------------------------------------------------------------------------------------------------------------------------------------------------------------------------------------|
| Sample size     | Sample size was not pre-determined.                                                                                                                                                                                                                                                                     |
| Data exclusions | No data were excluded.                                                                                                                                                                                                                                                                                  |
| Replication     | Most experiments were repeated at least 3 times, unless stated differently in figure legends. At least two independent clones of genetically modified (using CRIPR technology) cell lines were used for each assay. Sample size and number of independent experiments are stated in the figure legends. |
| Randomization   | No randomization was applied                                                                                                                                                                                                                                                                            |
| Blinding        | No blinding was used during sample collection and processing. However, unless indicated, image acquisition and data analyses were performed in an unbiased way using high-throughput high-content Opera Phenix microscope and Harmony software.                                                         |

## Reporting for specific materials, systems and methods

We require information from authors about some types of materials, experimental systems and methods used in many studies. Here, indicate whether each material, system or method listed is relevant to your study. If you are not sure if a list item applies to your research, read the appropriate section before selecting a response.

### Materials & experimental systems

| n/a                                 | Involved in the study                                     |
|-------------------------------------|-----------------------------------------------------------|
| <input type="checkbox"/>            | <input checked="" type="checkbox"/> Antibodies            |
| <input type="checkbox"/>            | <input checked="" type="checkbox"/> Eukaryotic cell lines |
| <input checked="" type="checkbox"/> | <input type="checkbox"/> Palaeontology                    |
| <input checked="" type="checkbox"/> | <input type="checkbox"/> Animals and other organisms      |
| <input checked="" type="checkbox"/> | <input type="checkbox"/> Human research participants      |
| <input checked="" type="checkbox"/> | <input type="checkbox"/> Clinical data                    |

### Methods

| n/a                                 | Involved in the study                              |
|-------------------------------------|----------------------------------------------------|
| <input checked="" type="checkbox"/> | <input type="checkbox"/> ChIP-seq                  |
| <input type="checkbox"/>            | <input checked="" type="checkbox"/> Flow cytometry |
| <input checked="" type="checkbox"/> | <input type="checkbox"/> MRI-based neuroimaging    |

## Antibodies

### Antibodies used

Antigen Raised in/type: poly/monoclonal Source, clone information Dilution for IB Dilution for IF  
 53BP1 Rabbit/poly Novus Biologicals, NB100-304 1:2000 1:500  
 ATM Rabbit/mono Abcam, [Y170], ab32420 1:2000  
 BRCA1 Mouse/mono Santa Cruz Biotechnology, D9 1:200 1:100  
 BRCA2 Mouse/mono Calbiochem/Merck, OP95 1:500  
 CtIP Mouse/mono Richard Baer, clone 14-1 1:50  
 Cyclin A Mouse/mono BD Biosciences, 611268 1:1000 1:100  
 GFP Mouse/mono Roche, 7.1+13.1 1:1000  
 GFP Rabbit/poly Life Technologies, 11122 1:1000  
 H2AX Rabbit/poly Abcam, ab11175 1:5000  
 H2B Rabbit/poly Abcam, ab1790 1:5000  
 H3 Rabbit/poly Abcam, ab1791 1:10000  
 H4 Rabbit/mono CST, 13919 1:1000  
 H2A Rabbit/poly Abcam, ab18255 1:1000  
 6xHis mouse/mono Genscript A00186 1:20000  
 MBP mouse/mono NEB/ E8032S 1:50000  
 MBP Rabbit/poly Sigma Aldrich, MBP-17 1:50000  
 MRG15 Rabbit/mono Cell Signaling, D2Y4J, 14098 1:1000  
 NBS1 Rabbit/poly Abcam, ab23996 1:1000  
 PALB2 Rabbit/poly Gift of Bing Xia, 25  
 1:500 1:100  
 RAD50 Mouse/mono Abcam, [13B3/2C6], ab89 1:1000  
 RAD51 Rabbit/poly Santa Cruz Biotechnology, H-92 1:500 1:100

RNF168 Rabbit/poly Millipore, ABE367 1:1000  
 RNF169 Rabbit/poly Abcam, ab87711 1:1000  
 RPA32 Mouse/mono Abcam, [9H8], ab2175 1:250  
 RPA32 Mouse/mono Mouse hybridoma, Shiloh lab 1:20  
-tubulin Mouse/mono Sigma Aldrich, T9026 1:104

## Validation

Each experiment had appropriate controls to validate the antibodies. Commercially available antibodies were validated by the supplier and by us using appropriate controls where needed; Supplementary Table 2. Please also refer to the manufacturers' websites for further details.

## Eukaryotic cell lines

### Policy information about [cell lines](#)

|                                                                      |                                                                                                                                            |
|----------------------------------------------------------------------|--------------------------------------------------------------------------------------------------------------------------------------------|
| Cell line source(s)                                                  | U2OS(TREX), U2OS(TLR), RPE1 (FRT), RPE1p53-(FRT), HEK293T: SP Jackson (Gurdon Institute, Cambridge, UK)                                    |
| Authentication                                                       | All cells were originally obtained from the ATCC cell repository, and we have authenticated cell lines used in our study by STR profiling. |
| Mycoplasma contamination                                             | All cell lines are routinely tested to be mycoplasma-free                                                                                  |
| Commonly misidentified lines<br>(See <a href="#">ICLAC</a> register) | No commonly misidentified cell lines were used                                                                                             |

## Flow Cytometry

### Plots

Confirm that:

- The axis labels state the marker and fluorochrome used (e.g. CD4-FITC).
- The axis scales are clearly visible. Include numbers along axes only for bottom left plot of group (a 'group' is an analysis of identical markers).
- All plots are contour plots with outliers or pseudocolor plots.
- A numerical value for number of cells or percentage (with statistics) is provided.

### Methodology

|                           |                                                                                                                                                                                                                                                                                                                                                                                                  |
|---------------------------|--------------------------------------------------------------------------------------------------------------------------------------------------------------------------------------------------------------------------------------------------------------------------------------------------------------------------------------------------------------------------------------------------|
| Sample preparation        | U2OS(TLR) cells (based on Certo et al. 2011 Nat Methods, Jul 10;8(8):671-6) were transfected with the indicated siRNAs and 6-8 h later cells were co-transfected with the HR-Donor and I-SceI expression plasmids. After ~72 h, cells were trypsinised and collected in 1% PBS/BSA.                                                                                                              |
| Instrument                | BD LSRFortessa cell analyser (BD Biosciences)                                                                                                                                                                                                                                                                                                                                                    |
| Software                  | FlowJo(BD Inc, USA)                                                                                                                                                                                                                                                                                                                                                                              |
| Cell population abundance | Cell sorting was not necessary to evaluate homologous recombination events, and was not performed for this assay.                                                                                                                                                                                                                                                                                |
| Gating strategy           | FSC/SSC gates define single cell population. For each condition, 10,000 live cells which were successfully expressing donor (BFP) and I-SceI(IFP) were scored for GFP (HR) and mCherry (mutEJ). GFP and mCherry gates were defined using BFP/IFP negative cell population as a negative control. Each siRNA treatment was normalised to a negative control siRNA targeted to firefly luciferase. |
| <input type="checkbox"/>  | Tick this box to confirm that a figure exemplifying the gating strategy is provided in the Supplementary Information.                                                                                                                                                                                                                                                                            |
